# Supplementary material for: Diagnostic Ability of Methods Depicting Distress of Tumor-Bearing Mice
Source: MDPI journal article supplement (doi:10.3390/ani11082155), 2021-07-21
Supplement: s1 [file s1]

**Table S1.** Distress score on mice.

| <b>Observation</b>                                    | <b>Score</b> |
|-------------------------------------------------------|--------------|
| <b>I Body weight</b>                                  |              |
| I-a decreased > 10% (compared to initial weight)      | 2            |
| I-b decreased > 20% (compared to initial weight)      | 5            |
| <b>II General condition</b>                           |              |
| II-a tooth displacement, too long teeth               | 1 (A)        |
| II-b fur dull, ruffled or untended                    | 2            |
| II-c eyes unclear or squinted                         | 2            |
| II-d untended orifices of the body                    | 3            |
| II-e abnormal posture                                 | 3            |
| II-f dehydration                                      | 3            |
| II-g short spasms or temporary paralysis symptoms     | 3            |
| II-h persistent (>30') cramping or paralysis          | 5            |
| II-i abnormal respiratory sounds or animal feels cold | 5            |
| <b>III Spontaneous behavior</b>                       |              |
| III-a the animal is passive or overactive             | 2            |
| III -b pronounced apathy, hyperkinetic, or isolation  | 4            |
| III -c squeaking due to pain                          | 5            |
| III -d self-mutilation                                | 5            |
| <b>IV Flight behavior after contact</b>               |              |
| IV-a animal is passive or overactive                  | 2            |
| IV-b distinct apathy or hyperkinetic                  | 5            |
| <b>V Process-specific criteria</b>                    |              |
| V-a wound healing disorder                            | 2            |
| V-b opening of the sutures by biting                  | 1 (B)        |
| V-c local inflammation                                | 2            |
| V-d ascites                                           | 4            |
| <b>Total score</b>                                    | <b>0–66</b>  |

Score points are stated per line as soon as one criteria applies. Even with several positive results per line, there is no addition of the points per line.

**Table S2.** Consequences according to distress score.

| Single Score | Total Score | Distress Level | Measures                                                                                                                                         |
|--------------|-------------|----------------|--------------------------------------------------------------------------------------------------------------------------------------------------|
| A            |             | mild           | Anesthetize animal and shorten teeth. Document it.                                                                                               |
| B            |             | mild           | Inform the person in charge of the experiment. If necessary, anesthetize the animal and close the wound. Document it.                            |
| 1            |             | mild           | Inform the person in charge of the experiment. A sufficient frequency of observation is necessary, consider treatment options and document it.   |
| 2–4          |             | moderate       | Inform the person in charge of the experiment. Daily observation of the animal is necessary, consider treatment options and document it.         |
| 5            |             | severe         | In agreement with the person in charge euthanasia (preferably painless after anesthesia) has to be performed. Document it.                       |
|              | 3–4         | mild           | Inform the person in charge of the experiment. Daily observation of the animal is necessary, consider treatment options and document it.         |
|              | 5–15        | moderate       | Inform the person in charge of the experiment. Euthanasia or treating the animal plus daily observation of the animal is necessary. Document it. |
|              | >15         | severe         | In agreement with the person in charge euthanasia (preferably painless after anesthesia) has to be performed. Document it.                       |
